# Supplementary material for: Single-cell profiling of human subventricular zone progenitors identifies SFRP1 as a target for stimulating progenitor activation
Source: Research Square preprint supplement (doi:10.21203/rs.3.rs-151881/v1), 2021-10-26
Supplement: Supplementary file 2 [file 384e92e720469b133dc5ed34.xlsx]

## Sheet: Figure 4d
		Sox2 SFRP1+			Sox2 SFRP1-
Control	16.67	54.76	7.69	83.33	45.24	92.31

## Sheet: Figure 4f
			P57+			P57-
	SFRP1	96.16	88.888	48.3145	3.84	11.12	51.6855

## Sheet: Figure 4h
	Mid-aged	Aged
	9378.29	23218.4
	7467.9	43687.2
		36509.7

## Sheet: Figure 4i
	GW9	GW16-17
	50408.3	133532
	0	205025
	0	112819
		196463

## Sheet: Figure 5b
		Control			Way (2uM)
0h	1	1	1	1	1	1
24h	1.23059	0.969101	0.809625	1.0401	1.2307	0.741003
72h	4.44446	3.14271	3.59672	6.08388	7.54715	12.5323

## Sheet: Figure 5d
	Cntr 24h	Cntr 72h	WAY 24h	Way 72h
	304	336	194	281
	128	210	152	431
	289	326	164	351
	141	381	139	277
	208	341	178	311
	275	311	242	407
				506

## Sheet: Figure 5e
	Cntr 24h	Cntr 72h	WAY 24h	Way 72h
	83	116	53	91
	38	68	55	118
	82	140	48	85
	48	202	24	77
	57	171	53	92
	81	109	45	167
				256

## Sheet: Figure 5f
	Cntr 24h	Cntr 72h	WAY 24h	Way 72h
	27.3026	34.5238	27.3196	32.3843
	29.6875	32.3809	36.1842	27.3782
	28.3737	42.9448	29.2683	24.2165
	34.0425	53.0184	17.2662	27.7978
	27.4038	50.1466	29.7753	29.582
	29.4546	35.0482	18.595	41.0319
				50.5929

## Sheet: Figure 7a
	Ccnd1			Ccnd2			Cdkn1c			Fzd5			Fzd7
	Cntr	WAY		Cntr	WAY		Cntr	WAY		Cntr	WAY		Cntr	WAY
	3.05746e-06	8.16647e-05		0.0434678	0.139647		0.00424052	0.00312718		0.000501926	0.00091305		0.000300928	0.000667443
	1.59571e-05	0.000109675		0.0675033	0.0558219		0.00311024	0.00408094		0.000449648	0.000231198		0.00041622	0.000505757
	1.26225e-05	6.9927e-05		0.0250486	0.0905947		0.0103954	0.0221956		0.00147538	0.00161977		0.000196865	0.000659731
	6.97825e-05	3.96343e-05		0.0524883	0.0915299		0.0170766	0.000467202		0.00164002	0.000422564		0.000213292	0.000313799
	1.46708e-05	0.000132699		0.0167811	0.0348185		0.0160043	0.0129222		0.000527769	0.00319384		5.67922e-06	0.000652788
	2.19014e-05	2.73387e-05		0.0241056	0.0226791		0.00539962	0.0237507		0.000866664	0.00363113		0.000183714	0.000343812
	3.78357e-05	7.69604e-05		0.0645452	0.0717746		0.00519012	0.0161629		0.00166256	0.00228616		0.000225782	0.000962343
	Axin2			Ctnnb1			Lef1			Tle1			Tcf7l1
	Cntr	WAY		Cntr	WAY		Cntr	WAY		Cntr	WAY		Cntr	WAY
	2.90137e-05	5.86648e-05		0.14743	0.370618		0.00581382	0.0148007		0.00112472	0.00656113		0.00054951	0.00154101
	0,000181433*	0,000367169*		0.194835	0.245502		0.00685999	0.00663343		0.00689095	3.28717e-05		0.00112603	0.00120036
	6.81564e-05	3.46064e-05		0.127022	0.355947		0.00570053	0.0257542		0.00355992	0.000781389		0.000986554	0.00253343
	1.69395e-05	2.57716e-05		0,636262638*	0.145667		0,01839878*	0.00503479		0.00163065	0.00481223		0.00189592	0.000834062
	5.54911e-05	4.17606e-05		0.0567956	0.204231		0.00794681	0.0224607		0.0010495	0.0300602		0.00125629	0.00267841
	3.81924e-05	0.000128704		0.17163	0.319372		0.00265821	0.0178883		0.00172085	0.0163791		0.000623057	0.000431829
				0.22777	0.220049		0.00800404	0.00555959		0.00443089			0.00137704	0.00246773
	Hes5			Nrarp			p38
	Cntr	WAY		Cntr	WAY		Cntr	WAY
	3.54238e-05	2.94688e-05		0.000116442	0.000314285		0.00373101	0.00117198
	2.7877e-05	7.08138e-05		0.000232215	0.000849069		0.00345505	0.00579988
	1.36861e-05	7.79161e-05		0.000140955	0.000969322		0.00259699	0.02874
	9.01549e-06	2.20041e-05		0.000164546	0.000305135		0.0044151	0.0138145
	7.48242e-06	5.77237e-05		0.000121948	0.000643393		0.00675379	0.00552396
	2.64034e-05	1.77014e-05		0.000120469	0.000303836		0.00789598	0.0115818
	7.50276e-07	9.0846e-05		0.000319409	0.00110561		0.0054362	0.00276981

## Sheet: Figure 7b
	Dcx			Cnpase
	Cntr	WAY		Cntr	WAY
	0.0283995	0.074897		0.00327109	0.0021996
	0.019282	0.0302774		0.00305279	0.00871152
	0.015891	0.101523		0.00303614	0.00470899
	0.0262769	0.0834677		0.00503423	0.00363246
	0.0159266	0.0811577		0.00289247	0.0126555
	0.0419518	0.112831		0.0012687	0.00392144
	0,100189084*	0.0645532		0.00279373	0.008092

[truncated: 15 more sheets: Figure 8b, Figure 8c, Figure 8d, Figure 8e, Figure 8f, Figure 8g, Figure 8h, Supplementary Figure 1f, Supplementary Figure 1g, Supplementary Figure 1h, Supplementary Figure 2b, Supplementary Figure 5b, Supplementary Figure 5c, Supplementary Figure 6c, Supplementary Figure 7]
